# Supplementary material for: TRAIL attenuates the development of atherosclerosis in apolipoprotein E deficient mice
Source: PubMed Central journal article supplement — Atherosclerosis. 2011 Apr;215(2):348–54. doi: 10.1016/j.atherosclerosis.2011.01.010 (PMC3074084; doi:10.1016/j.atherosclerosis.2011.01.010), 2011-04
Supplement: mmc1.pdf [file mmc1.pdf]

Supplementary Figure (Watt *et al.*)

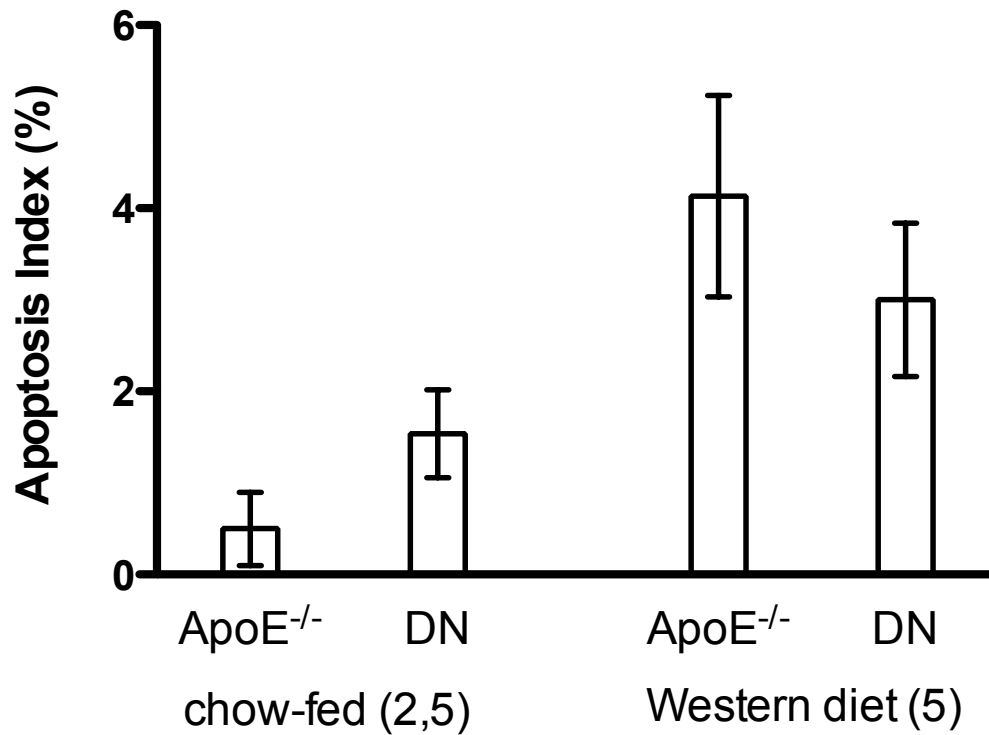

**Legend Supplementary Figure**

Apoptosis within atherosclerotic aortic root plaques after a 12 week feeding regime (chow or Western diet). TRAIL<sup>-/-</sup> ApoE<sup>-/-</sup> (DN) animals fed a Western diet exhibit a trend towards reduced apoptosis but this is not statistically significant. Numbers in parentheses indicate the number of separate animals - all visible plaques from 5 different sections were assessed from each animal.
