# Supplementary material for: TRAIL attenuates the development of atherosclerosis in apolipoprotein E deficient mice
Source: PubMed Central journal article supplement — Atherosclerosis. 2011 Apr;215(2):348–54. doi: 10.1016/j.atherosclerosis.2011.01.010 (PMC3074084; doi:10.1016/j.atherosclerosis.2011.01.010), 2011-04
Supplement: mmc2.pdf [file mmc2.pdf]

Supplementary Tables 1 and 2

**Table 1.** Biochemistry analysis of plasma from ApoE<sup>-/-</sup> and ApoE<sup>-/-</sup> TRAIL<sup>-/-</sup> mice fed chow and Western diet for 8 weeks.

|                  | ApoE null chow<br>(n=8) | DN chow<br>(n=8) | ApoE null Western | DN Western   |
|------------------|-------------------------|------------------|-------------------|--------------|
| Cholesterol mM   | 12.01(0.09)             | 10.64 (0.8)      | 24.14 (2.7)       | 25.2 (2.09)  |
| HDL mM           | 3.158 (0.18)            | 3.00 (0.13)      | 3.6 (0.5)         | 3.375 (0.23) |
| LDL mM           | 7.291 (0.60)            | 6.33 (0.60)      | 17.9 (2.6)        | 18.96 (1.09) |
| Triglycerides mM | 3.4 (0.45)              | 2.84 (0.69)      | 3 (0.65)          | 3.33 (0.66)  |
| Glucose          | 11.86 (0.9)             | 11.51 (0.83)     | 12.99 (1.01)      | 11.55 (0.66) |
| ALT IU/L         | 29.13 (3.2)             | 34.14 (4.4)      | 58.57 (15.9)      | 23.67 (3.7)  |
| AST IU/L         | 95.13 (17)              | 165 (45)         | 154.6 (38.4)      | 72.83 (7.3)* |

Data are mean +/- SEM, \* p>0.05

**Table 2.** Biochemistry analysis of plasma from ApoE<sup>-/-</sup> and ApoE<sup>-/-</sup> TRAIL<sup>-/-</sup> mice fed chow and Western diet for 12 weeks.

|                  | ApoE null chow | DN chow      | ApoE null Western | DN Western   |
|------------------|----------------|--------------|-------------------|--------------|
| Cholesterol mM   | 12.57 (0.50)   | 11.68 (1.54) | 25.46 (2.46)      | 22.0 (2.8)   |
| HDL mM           | 2.22 (0.15)    | 2.20 (0.22)  | 3.63 (0.35)       | 3.40 (0.52)  |
| LDL mM           | 9.62 (0.40)    | 8.9 (0.97)   | 20.2 (2.3)        | 17.8 (2.1)   |
| Triglycerides mM | 1.54 (0.33)    | 1.85 (0.43)  | 3.14 (0.69)       | 1.87 (0.45)  |
| Glucose          | 11.5 (0.66)    | 12.88 (1.18) | 11.89 (0.8)       | 9.8 (0.75)   |
| ALT IU/L         | 41.29 (3.8)    | 23.67 (0.66) | 47.3 (7.8)        | 36 (5.2)     |
| AST IU/L         | 120.4 (16.4)   | 76.0 (11.67) | 107.1 (14.1)      | 100.9 (14.0) |

Data are mean +/- SEM, \* p>0.05
